# Supplementary material for: Comparison of Bitterness Intensity between Prednisolone and Quinine in a Human Sensory Test Indicated Individual Differences in Bitter-Taste Perception
Source: MDPI journal article supplement (doi:10.3390/pharmaceutics14112454), 2022-11-14
Supplement: s1 [file s1]

# Supplementary Materials: Comparison of Bitterness Intensity Between Prednisolone and Quinine in a Human Sensory Test Indicated Individual Differences in Bitter-Taste Perception

Mengyan Deng, Noriko Hida, Taigi Yamazaki, Ryo Morishima, Yuka Kato, Yoshiaki Fujita, Akihiro Nakamura and Tsutomu Harada

**Table S1.** Primer sequences used for PCR and sequencing.

| Gene    | Purpose    | Primer Sequence             | Note                                                   |
|---------|------------|-----------------------------|--------------------------------------------------------|
| TAS2R19 | PCR        | CTGGGCTGTAACGAACCAT         | Forward                                                |
|         |            | GCTAGAAGACCCACGATGCT        | Reverse                                                |
|         | Sequencing | CTGGGCTGTAACGAACCAT         | Detection for SNP rs10772420                           |
|         | PCR        | GGTGGCAACCAGGTCTTTAGATTA    | Forward                                                |
|         |            | ACAGCTCTCCTCAACTTGGCATT     | Reverse                                                |
| TAS2R38 | Sequencing | CCAACTAGAGAAGAGAAGTAGAATAGC | Detection for SNPs rs713598, rs1726866, and rs10246939 |
|         |            | ACAAGGCTCAACTGGCAGA         |                                                        |
| TAS2R46 | PCR        | GAGTTGAATCCAGCTTTTAAC       | Forward                                                |
|         |            | ATAGCTGAATGCAATAGCTTC       | Reverse                                                |
|         | Sequencing | TTCACCTCTGACCCTGATATCTT     | Detection for SNP rs2708380                            |

**Table S2.** Perception of bitter aftertaste of each stimulus (gLMS score) as rated by subjects ( $n = 50$ ).

|      | Quinine<br>(0.1 mM) | Quinine<br>(1 mM) | Prednisolone<br>(0.2 mM) | Prednisolone-<br>Saturated<br>Solution | Prednisolone<br>Powder |
|------|---------------------|-------------------|--------------------------|----------------------------------------|------------------------|
| Mean | 2.5                 | 12.9              | 5.3                      | 9.5                                    | 9.6                    |
| Min. | 0.0                 | 0.7               | 0.0                      | 0.7                                    | 0.7                    |
| Max. | 12.0                | 58.7              | 38.0                     | 44.0                                   | 33.3                   |
| SD   | 2.6                 | 13.7              | 7.4                      | 10.4                                   | 8.6                    |
| CV   | 1.0                 | 1.1               | 1.4                      | 1.1                                    | 0.89                   |

**Table S3.** Relationships between prednisolone-saturated solution bitterness perception and TAS2R19 genotype.  $p$ -values are calculated by Fisher's exact tests.

| TAS2R19<br>Genotype | Strong | Medium or<br>Weak | P-value |
|---------------------|--------|-------------------|---------|
| GG                  | 23     | 3                 | 0.0553  |
| AG                  | 12     | 8                 |         |
| AA                  | 2      | 1                 |         |
|                     | 37     | 12                |         |

**Table S4.** Relationships between prednisolone-saturated solution bitterness perception and TAS2R38 phenotype. *p*-values are calculated by Fisher's exact tests.

| <b>TAS2R38<br/>Phenotype</b> | <b>Strong</b> | <b>Medium or<br/>Weak</b> | <b><i>p</i>-value</b> |
|------------------------------|---------------|---------------------------|-----------------------|
| PAV/PAV                      | 10            | 4                         | 1.0000                |
| PAV/AVI                      | 18            | 6                         |                       |
| AVI/AVI                      | 9             | 3                         |                       |
|                              | 37            | 13                        |                       |

**Table S5.** Relationships between prednisolone-saturated solution bitterness perception and TAS2R46 phenotype. *p*-values are calculated by Fisher's exact tests.

| <b>TAS2R46<br/>Phenotype</b> | <b>Strong</b> | <b>Medium or<br/>Weak</b> | <b><i>p</i>-value</b> |
|------------------------------|---------------|---------------------------|-----------------------|
| W/W                          | 20            | 5                         | 0.5154                |
| W/*                          | 16            | 8                         |                       |
| */*                          | 1             | 0                         |                       |
|                              | 37            | 13                        |                       |

**Table S6.** Relationships between 1 mM quinine bitterness perception and TAS2R38 phenotype. *p*-values are calculated by Fisher's exact tests.

| <b>TAS2R38<br/>Phenotype</b> | <b>Strong</b> | <b>Medium or<br/>Weak</b> | <b><i>p</i>-value</b> |
|------------------------------|---------------|---------------------------|-----------------------|
| PAV/PAV                      | 8             | 6                         | 0.0553                |
| PAV/AVI                      | 8             | 16                        |                       |
| AVI/AVI                      | 9             | 3                         |                       |
|                              | 25            | 25                        |                       |

**Table S7.** Relationships between 1 mM quinine bitterness perception and TAS2R46 phenotype. *p*-values are calculated by Fisher's exact tests.

| <b>TAS2R46<br/>Phenotype</b> | <b>Strong</b> | <b>Medium or<br/>Weak</b> | <b><i>p</i>-value</b> |
|------------------------------|---------------|---------------------------|-----------------------|
| W/W                          | 11            | 14                        | 0.3961                |
| W/*                          | 14            | 10                        |                       |
| */*                          | 0             | 1                         |                       |
|                              | 25            | 25                        |                       |

**Table S8.** Bitterness perception (gLMS scores) of the subjects sorted by male and female. *p*-values are calculated by Wilcoxon rank-sum tests.

|        | Quinine<br>(0.1 mM) |      |                 |  | Quinine<br>(1 mM) |      |                 |  | Prednisolone<br>(0.2 mM) |      |                 |  | Prednisolone-Satu-<br>rated Solution |      |                 |  | Prednisolone Pow-<br>der |      |                 |
|--------|---------------------|------|-----------------|--|-------------------|------|-----------------|--|--------------------------|------|-----------------|--|--------------------------------------|------|-----------------|--|--------------------------|------|-----------------|
|        | Mean                | SD   | <i>p</i> -value |  | Mean              | SD   | <i>p</i> -value |  | Mean                     | SD   | <i>p</i> -value |  | Mean                                 | SD   | <i>p</i> -value |  | Mean                     | SD   | <i>p</i> -value |
| Male   | 13.8                | 11.6 | 0.1901          |  | 38.1              | 13.7 | 0.5092          |  | 24.6                     | 19.6 | 0.6978          |  | 46.4                                 | 19.7 | 0.6836          |  | 32.2                     | 22.4 | 0.5736          |
| Female | 18.0                | 12.8 |                 |  | 42.1              | 21.6 |                 |  | 24.5                     | 13.8 |                 |  | 47.2                                 | 20.0 |                 |  | 36.1                     | 23.9 |                 |
